# Supplementary material for: Zinc Finger Protein-Based Prognostic Model in Lung Adenocarcinoma Highlights FGD3 as a Potential Marker for Lorlatinib Resistance
Source: Research Square preprint supplement (doi:10.21203/rs.3.rs-7976542/v1), 2025-12-01
Supplement: Supplementary file 1 [file 3201a196defb901c3a47a0be.xlsx]

## Sheet: Sheet1
Genenames
ERVK-19
MORC2
ZHX2
PIAS3
PCLO
RNF215
ZNF780B
ZFP37
CAPN6
IKBKG
USP3
NR2E3
KLF2
MAGED1
ZNF706
USP16
ANGPTL3
ZSCAN21
TRIM17
RNF114
ARIH1
KLF12
RNF115
TRAF6
USP15
ZNF451
KDM3A
MTF2
ZNF175
L3MBTL1
SALL2
ZNF711
PYGO1
ZNF330
ZNF337
RNF11
ZDHHC9
ZBTB12
NOSIP
KLF13
ZBTB32
ZNF281
GIT1
ZNF257
ZNF256
ZNF835
FAN1
ZKSCAN5
KDM2A
USP20
ZBTB1
RPH3A
PIKFYVE
ZNF510
ZFP30
DTX4
ZNF652
ZNF443
RUVBL1
POLH
RNF6
TCF19
RUVBL2
RNF24
ZNF148
HDAC5
SRRM2
RIMS2
UNC13A
PHF24
USP22
ZC3H4
ZFR2
PDZRN3
TRIM35
AGAP1
PHF8
TRIM33
PLAGL2
BSN
ZNF232
PPIE
ING4
DUSP12
STUB1
RPH3AL
SUFU
PRPF19
KMT2B
PLAGL1
AKAP8L
RNF112
NOB1
CBLC
CIZ1
ZMYND8
ZNRF3
ZNF490
RNF150
ZMIZ1
ZBTB21
ASAP1
ZNF608
ZNF777
BRPF3
ZDHHC8
MYT1L
ZNF214
ZNF215
PNMA3
ZNF346
ZNF236
ZHX1
AMFR
IKZF3
IKZF2
PRDM4
GPATCH8
ING1
ZNF580
ZNF221
ZNF222
ZNF223
ZNF225
ZNF180
ZNF229
DNMT3L
MID2
ZNF112
LEF1
SALL4
ZNF391
ZFP69B
ZMYM5
MAGEL2
MBD1
PHF11
AK3
ZDHHC2
ZNF107
KLF15
BAZ1B
BAZ2A
BAZ2B
ZNF230
ZNF639
SERTAD1
ZNHIT2
NUFIP1
TRPS1
MKRN1
FBXO40
EBF1
TCF20
ZC3H7B
KDM5B
ZRANB1
ZBTB47
ZNF629
TRIM10
ZMAT5
ZNF282
ZNF212
ZNF69
ZNF70
ZMYM2
DBF4
POLK
RNF14
HDAC6
ASH2L
RNF7
MAGEC2
DNMT3B
MBD2
ZNF219
ANKMY1
ANKFY1
ZNF624
ANKIB1
ZNF319
MARCHF4
ZNFX1
ZNF492
ZFAT
ZSWIM5
ZBTB4
PHRF1
CXXC1
ZNF581
RNF181
MARCHF2
ZKSCAN7
KCMF1
ZIM2
BFAR
ZNF224
IGF2BP1
RBAK
ZNF226
MAP3K20
TAB2
ANAPC11
ZDHHC3
MTMR4
ZNF586
ING3
GIN1
RNF186
TRMT1
ZDHHC7
ZSCAN32
LYAR
MARCHF5
C2orf42
ZNF446
ZNHIT6
RNF216
RBM22
FANCL
ZNF358
RLIM
THAP1
ZNF701
RNF19A
TRMT13
ZDHHC18
ZCCHC3
ZBTB40
ZFP57
RNF146
ZFP64
ZNF355P
ZNF275
SALL1
RAD18
TOPORS
ZNF277
BAZ1A
DISC1
SMYD2
TSHZ2
SLC2A4RG
ASH1L
PDLIM7
ZNF302
ZNF71
ZC4H2
ZNF331
PRDM5
PRDM6
PRDM7
PRDM8
PRDM9
PRDM10
EXOSC3
EXOSC5
JADE2
TRIM36
SCRT2
DCP1A
ZDHHC4
ADAP2
MYNN
CCNB1IP1
ZCCHC17
ARFGAP3
ERVK-5
ZNF334
ZNF304
TRIM39
ZFP14
ZDBF2
ZBTB26
ZSWIM6
MSL2
MAGEE1
ZNF160
ZNF532
ZFYVE28
ZBTB20
ZNF286A
ZNF287
ZFYVE1
PATZ1
RC3H2
SP110
PRDM16
MAGEF1
SAP30L
ZNF556
ZMAT3
LIN28A
RNF122
FKRP
UNKL
ZNF408
EHMT1
MARCHF7
ZNF702P
SP140L
RNF121
ANKZF1
ZDHHC11
TRIM45
PLEKHF2
ZFAND3
ZNF395
ZNF430
ZMAT4
ZNF696
ZNF703
ZNF665
ZNF442
ZSWIM4
SMYD3
ZNF552
RNF167
ZDHHC6
TUT1
ZNF385D
RPP21
ZNF576
IKZF5
ZCCHC4
ZBTB3
ZNF768
ZNF644
ZNF335
ZSCAN16
PRDM12
PRDM13
RNF41
ZHX3
DPH3P1
KDM4C
TRIT1
TP63
GGNBP2
FOXP1
ZNF106
IKZF4
RNF39
ADNP
CXXC4
VPS11
RBSN
GTSF1L
IRF2BPL
BCL11A
ING2
GZF1
RNF208
ZNF700
ZCWPW1
PARP12
RACGAP1
SHARPIN
RNF38
USP44
ZNF541
ZMYND12
RNF32
ZMYND15
SPRTN
MKRN2
AICDA
ZNF350
PRDM14
PEG3
EGLN1
BCL11B
ZNF407
ZNF436
LNPK
ZC3H12C
ZNF518B
ZCCHC2
ZDHHC5
UNK
ZFHX2
INO80B
TRIM2
TRIM4
TRIM5
TRIM6
TRIM7
TRIM9
TRIM15
TRIM31
FOXP3
TRIM8
PRKD2
GLIS2
NSD3
IFIH1
TRIM55
TRIM54
ZNF341
RBCK1
HELZ2
TRIM34
SEZ6L
PCGF6
RNF26
KDM5D
ZNF717
SCAPER
FANCD2
TEX13A
TEX13B
RNF17
TDRD1
KLF16
SALL3
ZNF471
GATA5
PHF7
SCRT1
ZNF416
RBM4
TRAIP
REPIN1
PHF20
TRIM62
ZNF747
RNF126
MLPH
TRAF4
ZNF426
PHF23
ZSCAN5A
ZNF692
ZBED2
DIDO1
THAP7
PCGF1
ZNF577
TRIM51
ZNF2
ZNF670
ZNF649
TRIM56
ZNG1A
ZKSCAN3
PYGO2
OVOL2
ZNF251
ZNF559
ZSWIM1
FYCO1
RTP3
HINFP
SLX1A
ZFYVE21
RBM4B
RNF5
BARD1
GFI1
ZNF184
CGRRF1
KLF6
ZBTB18
SCAF11
MAP3K14
RNF2
AGAP2
INSM2
UHRF1
RUFY1
ZIC5
RSF1
ZSCAN10
ZNF382
ZNF587
FIZ1
ZNF607
STRBP
ZNF347
PLEKHF1
WRNIP1
UIMC1
ZNF300
PHF12
PPP1R10
SMG1
RNF157
UHRF2
ZNF317
TRERF1
ZNF385A
RCHY1
ZIM3
AGAP4
WDFY2
ACAP3
ARAP1
AGAP3
ZNF599
ZFP3
ZNF285
ZNF570
ZNF582
ZNF558
ZNF583
ZMAT2
ZNF830
RILP
ZNF396
ZNF641
ZNF578
ZNF714
ZNF681
ZNF75A
ZNF48
ZDHHC15
ZNF778
RNF145
ZNF560
ZSWIM3
ZNF488
TCEANC2
ZFP42
NSMCE2
ZNF512
AK8
FGD4
MAGEB18
ZNF597
ZSCAN31
PRIMPOL
ZNF354B
TRIM47
NSD1
ZFR
EHMT2
TNIP3
ZNF512B
ZNF521
ZC3H10
ZNF514
ZBTB45
ZNF668
ZFYVE19
RNF170
ZFP91
CHAMP1
ZNF462
ZNF333
ZNF469
MAGED4
ZNF594
ZNF479
HIC2
ZBED3
ZNF496
ZNF845
ZNF414
ZNF625
ZNF419
ZNF764
ZC3HAV1L
ZNF486
ZC2HC1A
ZDHHC12
RNF185
ZNF799
ZNF274
DUS3L
DPH3
NEIL1
ZBED10P
ZNF503
TRIM11
DNAJA3
RNFT2
RNF125
CHFR
RNF31
PHF21B
NEURL3
ZNF837
ZMYND19
RTP4
TRIM44
RSPRY1
ZBTB10
RNF183
ZNF501
ZNF689
ZNF653
TIFA
INTS12
BIRC7
ZNF524
ZNF707
SYTL4
ZBTB9
ZNF775
ZBTB8A
ZNF669
TRIM43
RNF25
PHF21A
ZNF428
ARK2N
MIB2
ZUP1
TRIM52
RNF166
ZNF566
ZDHHC16
MUL1
ZNF622
NEIL2
L3MBTL2
TRIM63
RNF34
ZKSCAN4
USP13
ARHGEF2
TNPO1
GATA6
DDX17
JARID2
TAF15
KAT6A
CREBBP
DPF2
DPF3
DPF1
RREB1
ZNF75CP
GTF3A
ZNF516
JADE3
ZNF592
PHF3
RFFL
ARAP2
ZCCHC14
ING5
KAT6B
THAP4
MYLIP
NANOS1
GATAD2B
ZNF606
RUFY2
ARAP3
SPIRE2
ZNRF4
ZFPM2
ZCCHC13
GTSF1
RNF133
ZDHHC19
RNF141
RNF138
ZFAND2B
TRIM41
ZNF480
NSMCE1
GATAD1
ZNF296
CHURC1
PHF10
ZC3H15
SMAP2
U2AF1L4
RNF139
ZDHHC1
THAP3
ZNF473
ZNF384
FBXO41
ZNF526
ZFP90
ZNF418
FNIP1
ZNF483
ZNF431
AGAP11
ZNF721
USP33
SH3RF3
SH3RF2
RNF128
MORC4
OTUD7A
ASAP3
SYTL5
CHD5
RASGRP4
SP7
DTX3L
KLF14
ZNF675
ZNF398
MARCHF1
FAM200A
ZNF507
ZFAND1
RNF217
ZNF596
ZNF564
ZNF502
ZCCHC10
FEZF2
ZCRB1
ZSCAN18
LNX1
ZNF519
FBXO30
OSR1
ZNF671
ZNF417
NPLOC4
NEIL3
ZNF420
ZNF461
SLC30A5
ZNF563
CTCFL
ZFP28
COP1
KDM2B
ZNRF2
PJA1
TRIM58
FBH1
MYRIP
TET1
DBF4B
ZNF397
ZMIZ2
KMT2C
ZNF555
ZNF680
ZNF548
ZSWIM2
GLIS3
ZNF738
ZNF740
ZNF248
ZNF540
ZNF439
ZNF280C
ZNRF1
RNF214
ZBTB44
RNF169
ZBTB34
ZNF485
ZNF784
RNF149
ZNF114
GLIS1
ZSCAN1
ZFP62
ZNF527
ZNF511
SMYD1
ZBTB8B
ZBTB38
ZSCAN4
ZNF579
MARCHF10
ZNF383
ZNF610
WDSUB1
TRIML1
KRI1
ZIC4
ZNF565
DTX3
ZNF454
ZNF557
ZNF709
ZDHHC22
ZNF441
ZFP41
RTL3
RNF152
ZNF491
ZNF615
ZNF321P
ZNF513
ZNF781
TCEANC
ZNF366
ZNF614
ZNF713
ZNF611
UBR7
ZNF676
ZNF283
ZNF433
CBLL2
RNF148
TRIML2
ZNF525
ZNF655
ARFGAP1
ZFAND2A
ARFGAP2
RNF182
ZBTB2
RNF10
ZC3H8
CISD2
TAB3
ZGPAT
ZNF561
ZCCHC9
ZNF276
ZNF808
RNF175
RYBP
LNX2
ZNF843
ZCCHC7
VPS8
CMYA5
ZNF664
ZNF786
PIAS4
OSR2
ZNF619
ZCCHC24
ZNF710
ZNF687
ZNF567
BCL6B
ZFP82
CPXCR1
ZNF444
WDFY3
RNF113B
ZDHHC14
ZNF654
XRN1
KMT2E
ZNF101
ZNF34
ZNF683
FAM200C
DZIP1L
ZNF679
RNF168
SMYD4
ZDHHC23
ZNF100
TRIM22
ZNF440
ZZZ3
ZNF595
SMAP1
YAF2
SP8
ZC3H3
RPAP2
PARP9
ZFPM1
TRIM42
TRIM48
ZSCAN29
UBR2
UBR1
CUL9
ZBTB8OS
PHF6
TRIM59
ZC3H7A
WDFY1
ZNF695
APLF
SIAH3
ZDHHC21
ZNF547
FOXP4
ZNF584
ANKMY2
SIAH1
ZDHHC17
ZDHHC13
ZNG1B
RNF135
DCP2
MIB1
GATAD2A
MARCHF9
PHF13
ZNF280B
DZIP1
ZNF573
ZGRF1
ZNF354C
DZIP3
DTX1
ZNF677
TRIM50
RNF130
MEX3D
ZNF761
ZSWIM9
ZNF575
ZFAND4
ZNF227
TRIM69
ZC3HC1
ZSCAN30
JAZF1
TAX1BP1
ZC3H18
ZNF410
MORC1
ZNF429
CASZ1
ZBTB46
DTX2
TRIM73
TRIM74
BCL9L
RIMS1
ZNF589
ZFHX4
ZNF598
ZNF546
ZNF329
MARCHF3
SYVN1
ZNF554
PEG10
RNF180
ZNF605
ZBTB33
PCGF5
ZSCAN2
ZNF467
FGD2
SH3RF1
RBBP6
IRF2BP2
RAI1
ZNF804A
BRAP
ZNF438
TRIM46
RNF144B
ZNF571
ZFYVE16
POGZ
ZNF572
ZNF550
ZNF551
ZC3HAV1
TRMT1L
KRBOX5
APTX
ZNF367
PHF5A
CXXC5
ERVK-6
ZNF627
G2E3
MAEA
MCM10
ZNF771
ZNF765
DHX30
RNF44
ZNF534
CBLL1
ZNF767P
ZNF365
USP45
USP51
USP49
RFPL4B
FGD6
ZNF833P
TRIM67
ZNF826P
UBR3
TSHZ1
ARHGEF18
COL25A1-DT
ZNF621
ARK2C
ZBTB49
ZNF662
RNF207
ZNF818P
RTL4
ZNF493
ZNF788P
FGD5
ZNF497
ZNF600
ZNF620
RUFY4
ZNF704
NFXL1
RNF111
ZNF836
ZNF705A
ZFP2
ZNF574
BNC2
ZNF841
AEBP2
LIN28B
ZNF793
ZNF66
ZNF813
MEX3B
RNF19B
ZNF517
SPOCD1
ZNF782
ZNF730
TRIM72
KDM7A
ZNF783
ZNF852
PDZRN4
SLC30A10
NHLRC1
ZNF562
ZDHHC24
LRSAM1
ZNF322
ZNF474
SCAND3
TRAF7
ZNF773
ZC3H14
TRIM65
ZNF790
ZNF613
ZCCHC12
ZNF880
FBXL19
RFWD3
ZNF449
TRIM40
ZNF549
ZNF530
DNAJC24
ZNF585A
ZFP1
ZNF529
ZNF343
GTF2H2C;
DHX57
ZCCHC8
FAAP20
ZNF544
ZNF774
SWSAP1
ZNF746
ZSCAN25
ZNF280D
ZNF425
ADNP2
ZNF770
SNRNP48
JADE1
OTUD7B
XAF1
ZFAND6
ZNF470
PLAG1
ZNF787
SP5
TRIM68
ZNF660
ZNF324B
ZNF518A
ERVK-6
ZNF57
ZNF772
ZNF626
RNF43
ZFYVE26
ZNF776
ARID2
E4F1
ZNF385C
RNF213
TSHZ3
ZKSCAN2
RNF123
ZDHHC20
BSPRY
OBI1
ZMYM4
TUT7
TAF3
AGAP6
YOD1
ZNF691
AGAP7P
ZNF318
RNF20
AGAP9
GFI1B
RNF220
ZNF468
MEX3C
ZNF658
AHDC1
ZC2HC1B
ZNF697
RC3H1
ZBTB37
TUT4
RNF187
ZNF618
PHF19
ZNF648
ZNF684
UBR4
ZFYVE27
ZC3H13
DDX59
HIVEP3
DCST1
MARCHF8
ZNF362
DNLZ
ZNF678
ZMYM1
ZBTB41
ZNG1E
RTP2
ZNF569
RNFT1
ZNF506
ZNF484
KRBOX4
ZNG1C
KLF17
FGD3
ZNF831
ZNF311
ZC3H12B
ZNF667
ZNF766
ZMAT1
ZNF789
ESCO1
ZRANB3
DNAJC21
TRIM61
ZNF542P
RILPL1
ZNF628
ZC3H12A
ZNF805
ZNF326
PAN3
ESCO2
ZNF385B
TAF1B
USP39
PARP10
ZNF394
ZC2HC1C
ZNF585B
ZCWPW2
SYTL3
FLYWCH1
MSS51
ZNF658B
ZNG1F
ZBED5
ZFP69
ZNF876P
ZNF672
LONRF3
TRIM60
RNF212
ZNF404
PARP14
PARP15
ZNF568
ZNF260
SP6
ZIK1
ZNF718
ZSCAN23
ZNF528
ZNF792
ZNF791
SNAI3
PCGF3
ZNF829
ZNF750
ZNF699
ZNF284
ZNF800
QRICH1
ZXDC
TRIM71
ZNF674
ZNF181
ZNF630
ZNF423
RNF151
LONRF2
ZSWIM7
LONRF1
ZNF827
ZSCAN26
SRSF7
ZNF239
TAF9
ZNF74
PDCD2
E2F4
ZNF124
ZNF726P1
ZNF79
ZNF77
ZNF141
ZBTB6
ZIC1
ZFHX3
SMAD1
SMAD2
ZKSCAN8
NAB2
ZNF174
ZRSR2
ZRSR2P1
TRIP4
ZNHIT3
SF1
TCEA2
SEC23B
SEC23A
ZMYND11
EEA1
ZNF146
ACAP2
SETDB1
ACAP1
EXOSC7
SUZ12
RTP5
ATXN7L3
SHPRH
NR1D2
KPNB1
ZNF638
ZNF169
MTF1
CHD4
ZNF846
MVP
MELK
ZNF273
ZNF460
ZNF235
ZNF234
ZNF268
ZNF267
ZNF345
ZNF266
MCM6
HLTF
HIC1
SLBP
TRIM25
NPAT
ZMYM3
SCARF1
GIT2
MORC3
TRIM14
SERTAD2
UBE4A
TRIM29
VEZF1
GTF2H2
KLF5
KLF9
ENPP2
RAPSN
PMS2P11
MTMR3
HDAC1
RIPK1
NAB1
SQSTM1
BIRC2
BIRC3
SMAD4
MKRN4P
XRCC4
IKZF1
ZNF211
CTBP1
ZNF177
PPIL2
KLF1
SP140
TRIM28
MAP3K1
CBLB
CBX3
CALCOCO2
RLF
REST
KLF10
TRAF3
ZNF154
ZBTB17
MKRN3
TRIM32
PRDM2
NFX1
TRAF2
ILF3
ZNF155
TRIM26
SF3A3
CHD3
BPTF
ZNF816
INCA1
ZNF763
ZNF415
EP300
ZNF543
ZNF616
ZNF844
SPIRE1
TLE5
POLE
ZFP36L1
EGR3
ZNF33B
ZNF33A
RING1
RUNX1T1
PRKCD
ZBTB16
ZNF91
EGR4
RELA
ZNF90
ZNF92
ZNF117
ZNF85
PPARD
KMT2A
MECOM
CREB5
SP3
SP4
ZNF45
SP2
BNC1
EWSR1
MYT1
INSM1
MDM2
ZNF200
RBM10
FGD1
ZXDB
ZXDA
ERVK-10
ZBED6
SMAD3
PRR3
ELF3
RNF4
EEF1A1
CSNK2B
UBE2I
ERVK-24
ERVK-7
ERVK-9
ERVK-9
RBX1
RAN
ERVK-8
HERVK_113
ERVK-21
CNBP
RPL37
ZC3H6
NANOS3
NANOS2
ZNF445
ZNF280A
RTP1
ZNF121
KLF3
PRDM15
CTBP2
MAZ
RAG2
BRPF1
MLLT6
MLLT10
VCP
EIF5
SEC24C
TTC3
LIMK1
NKX2-5
HMGA2
CHN2
RBM5
ZNF143
ZNF142
ZNF138
ZNF137P
ZNF135
ZNF134
ZNF132
ZNF131
ZNF140
ZNF136
ZNF133
HNRNPF
AGFG1
KPNA2
MNAT1
ZNF75D
ZNF41
ZNF157
HCFC1
ZNF84
ZNF83
ZNF81
ZNF80
RNF144A
LIG4
LIG3
ZNF165
GSK3B
RANBP2
NUP153
MCM2
CEBPA
CTCF
PXN
ZFP36L2
ATRX
USP5
ABCG1
GATA4
MAGEA6
MAGEA3
MAGEA2
HELZ
RPS27
PRKCI
NBL1
KDM5C
BCL6
IGHMBP2
BRCA1
ZEB1
ZNF76
TRIM23
ZNF93
FUS
RORA
RPA3
PCGF2
BMI1
CTNNB1
CIITA
DNAJA1
HIVEP2
CLIP1
PML
KDM5A
GTF2E1
MZF1
PEX2
RPA1
AK4
ZFP36
U2AF2
DNMT1
CTNNA2
LMO1
YY1
CCND1
ZBTB25
GATA3
GATA2
TCEA1
XPA
CBL
ENPP1
TNFAIP3
ZNF10
CSRP1
NR1D1
RAB5A
TBP
RXRA
WT1
TRIM21
NCL
EGR1
XBP1
ATF7
ZNF8
ZNF7
ZNF32
ZSCAN20
ZNF30
ZNF43
ZNF3
ZNF28
ZNF37A
ZNF26
ZNF25
ZKSCAN1
ZNF24
ZNF23
ZNF22
ZNF182
ZNF20
ZNF19
ZNF18
ZNF17
ZNF16
ZNF708
ZNF14
ZNF12
ZFX
ZNF823
GATA1
RPA2
RAG1
RPS2
HIVEP1
ZNF250
ZNF44
ATF2
BRAF
TRIM27
ZNF35
XRCC5
SRC
CDK4
EGR2
NR2F1
RARA
AR
GLI4
ZBTB48
ZSCAN22
ZNF875
GLI3
GLI2
ZFTRAF1
ZC3H11C
ZNF723
ZNF728
RNF224
ZNF888
ZNF865
TRIM49C
TRIM49
ZNF705B
ZNF705D
SP9
ZCCHC18
ZNF286B
ZNF883
ZNF853
GPR89B
ZSCAN5DP
FAM200B
ZNF735
ZNF688
ZDHHC11B
ZGLP1
POLA1
PARP1
HNRNPA1
SNRPC
GLI1
ZFY
SP1
EIF4E
TP53
NR3C1
RAF1
TF
EGFR
NSD2
ZBED1
SNAI1
ZMYM6
RIGI
WIZ
ZNF682
HERC2
BRD1
CPSF4
CNOT4
ZBTB11
KLF8
SEC24B
SEC24A
ABCA1
PARN
ZIC2
ZFYVE9
SLU7
ARIH2
ZBTB7A
TRIM16
RASGRP1
KAT7
ZRANB2
ZNF205
ZFPL1
UBE4B
ZNF202
AGFG2
TRIM37
USP19
KDM4B
UBOX5
FRYL
ZNF432
PHF14
SEC24D
LTN1
ZFAND5
RNF8
NEURL1
PIAS2
PIAS1
KLF7
ZNF189
CAPN15
ZMYND10
TCEA3
ADAP1
RFPL3
RFPL2
RFPL1
PRDM1
MYCBP2
WBP4
ZNF821
ZNF324
SAP30
ZNF254
DEAF1
TRIM3
ZNF737
ZNF217
ZNF253
ZPR1
ZNF780A
KDM4A
ZC3H11A
PHF2
RNF40
ZBED4
ZNF623
CBFA2T3
KIN
TRIM13
ZNF354A
CTNND1
PEX10
PRMT3
ZIC3
ZNF861P
MARCHF6
ZEB2
ZNF500
ZFC3H1
MGRN1
ZNF862
ST18
ZNF292
PRKN
AIRE
ZBTB14
BUB3
ZNF207
SNAI2
HR
PSTPIP1
RNF13
KLF4
CBFA2T2
ZNF749
ZNF208
ATMIN
ZSCAN12
ZBTB43
ZNF264
TGFB1I1
ZNHIT1
SIAH2
PHF1
ZBTB24
PJA2
TET3
ASAP2
ZZEF1
MEFV
KDM6A
RNF113A
ZSCAN9
MAGEB2
FOXP2
YY2
MID1
OGT
ZNF185
ZBTB22
TRIM24
ZBTB7B
MDM4
CHUK
ZNF536
ZBTB5
ZBTB39
TRIM66
ZNF646
ZNF609
ZNF263
HGS
IKBKB
KLF11
ZNF213
OVOL1
ZNF197
KMT2D
ABLIM1
ENPP3
ZNF195
TRAFD1
TRIM38
PEX12
BCL9
ZNF593
TRAF5
CBX4
RNF103
OVOL3
RNF225
TRIM77
RFPL4AL1
NACA
ZNF587B
RNF223
ZNF878
ZFTA
KRBOX1
TRIM49D1
ZNF814
ZNF732
ZNF736
ZNF879
ZBTB42
ZNF487
ZNF99
ZNF705EP
PHF20L1
ZNF705G
ZNF727
ZNF724
RNF212B
ZBBX
ZNF891
NEURL1B
ZNF850
ZNF785
ZNF815P
ZNF839
ZSWIM8
ZNF716
USP27X
ZNF726
MARCHF11
ZNF729
CPSF4L
ZFP92
RFPL4A
TRIM64C
ZNF98
ZNF233
TRIM75
ZSCAN5B
AGAP5
RNF227
TRIM64B
EPOP
ZNF860
TRIM64
ZSCAN5C
ZNF316
ZNF840P
TRIM49B
RNF222
TRIM43B
BDP1
ZNF804B
ZNF320
ZC3H12D
ZBTB7C
FSD2
MEX3A
FAM170A
FEZF1
TMEM129
RNF228
TRIM51G
ZNF722
ZC3H11B
ZNF475
KLF18
TEX13D
TEX13C
ZNF892
