# Supplementary figures and images for: Zinc Finger Protein-Based Prognostic Model in Lung Adenocarcinoma Highlights FGD3 as a Potential Marker for Lorlatinib Resistance
Source: Research Square preprint supplement (doi:10.21203/rs.3.rs-7976542/v1), 2025-12-01

NC1

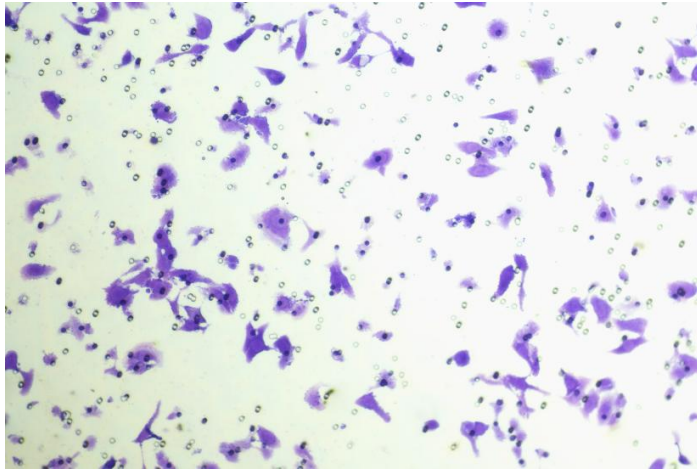

NC2

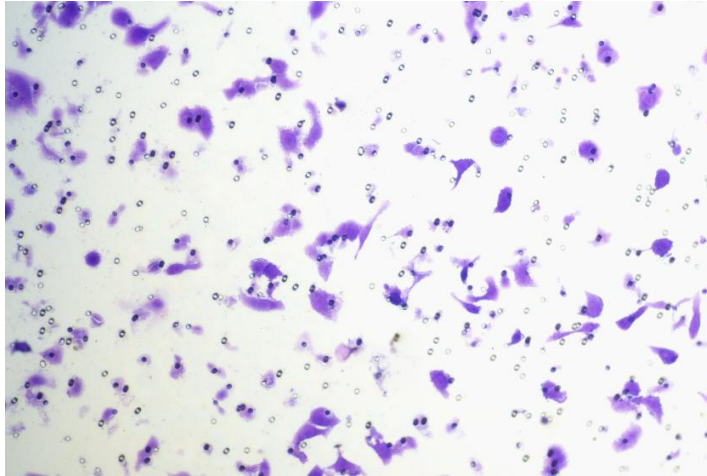

NC3

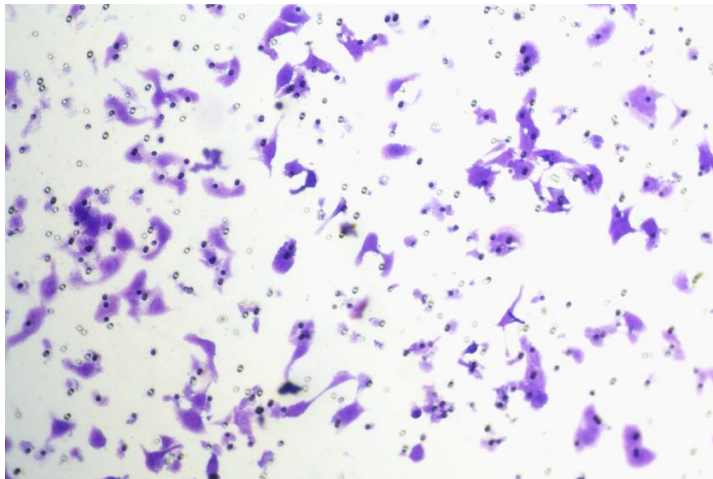

OE1

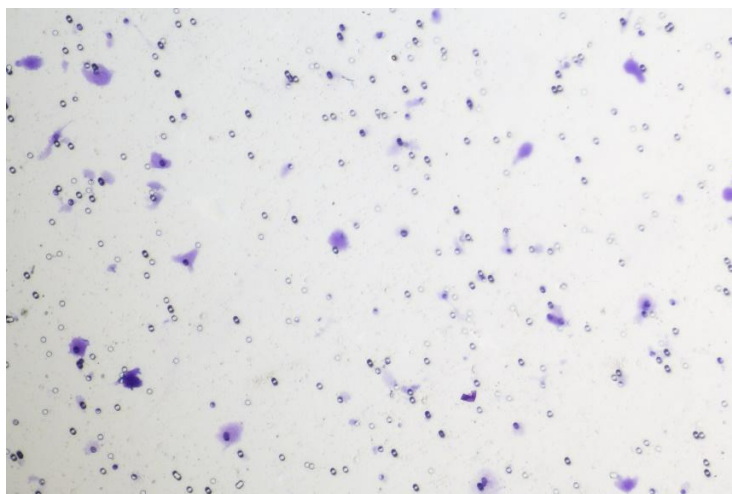

OE2

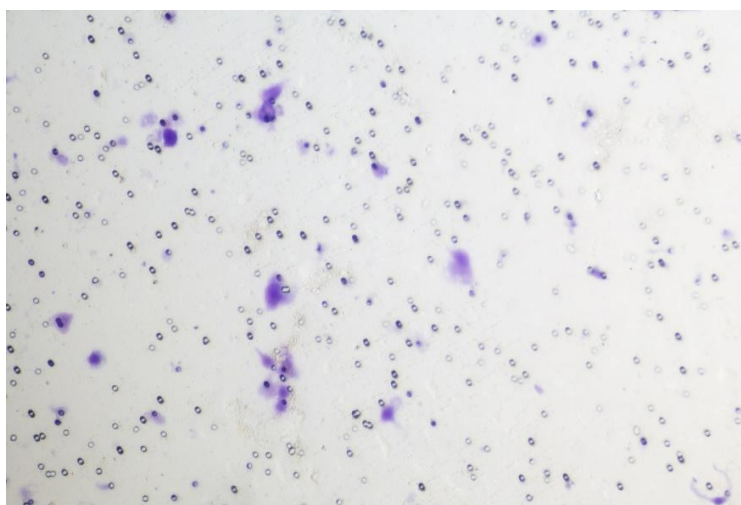

OE3

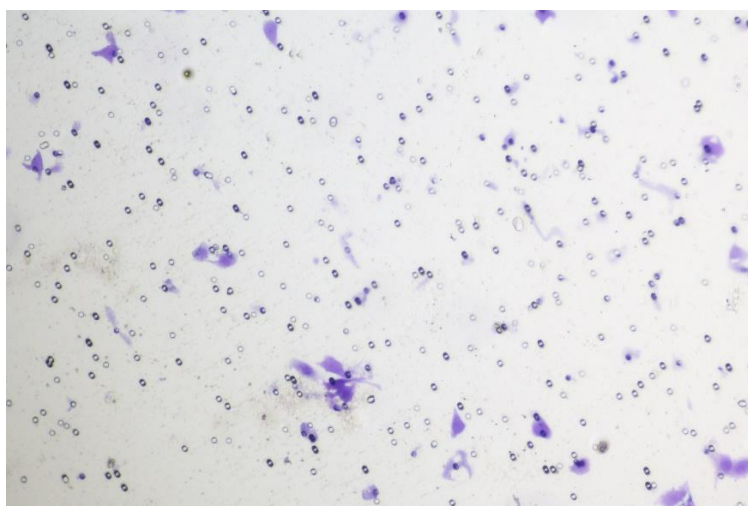

Supplement: Supplementary file 1 [file 1ce4021ed488f73cdb04f7f6.pdf]
